# Supplementary material for: The use of an IV to PO clinical intervention form to improve antibiotic administration in a community based hospital
Source: PubMed Central journal article supplement — BMJ Qual Improv Rep. 2015 Jan 28;4(1):u200786.w2247. doi: 10.1136/bmjquality.u200786.w2247 (PMC4645920; doi:10.1136/bmjquality.u200786.w2247), 2015-01-28

## Appendix: Baseline & Follow-up Measurements

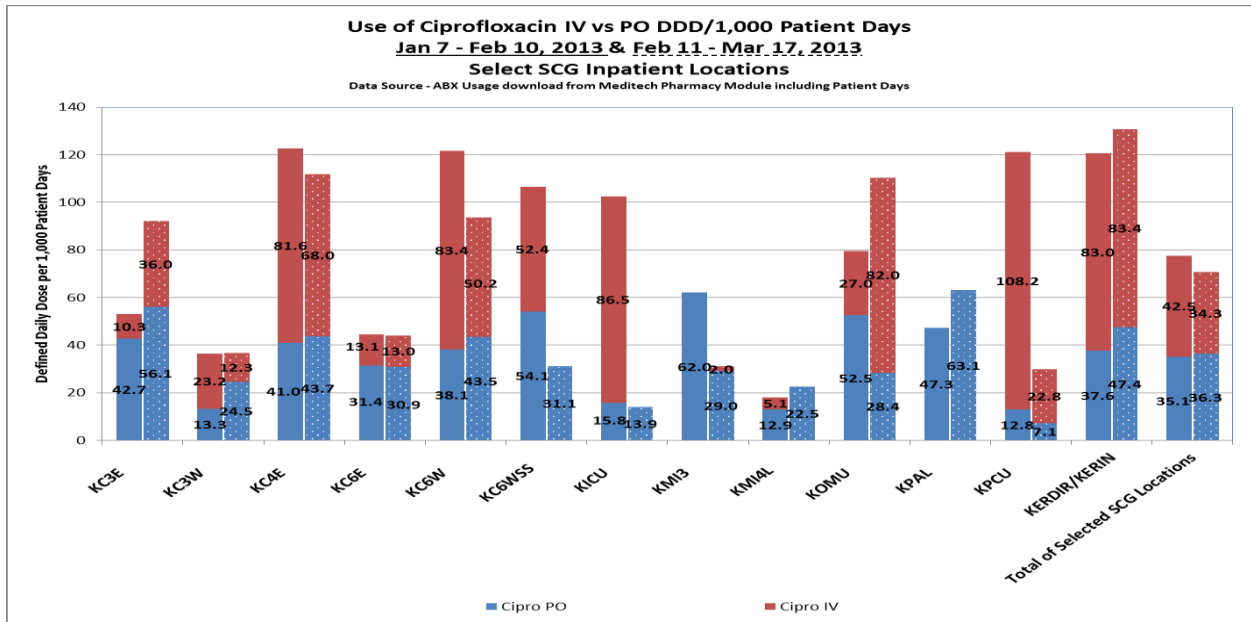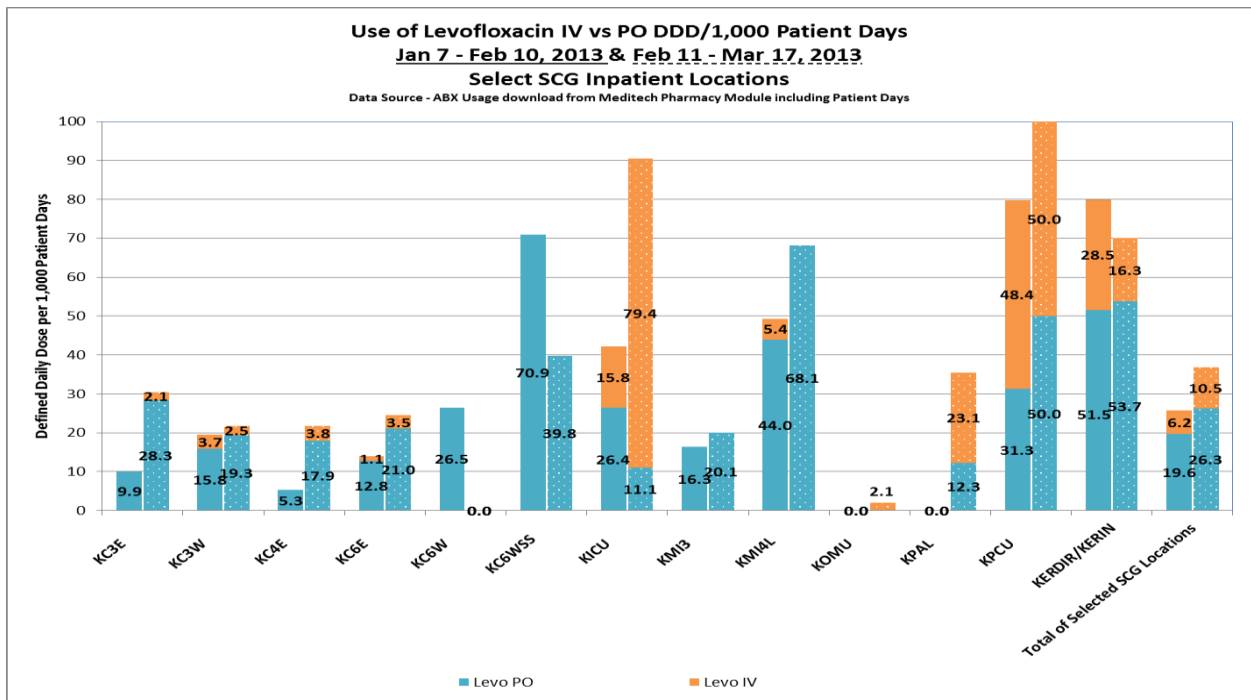

**Use of Moxifloxacin IV vs PO DDD/1,000 Patient Days**  
**Jan 7 - Feb 10, 2013 & Feb 11 - Mar 17, 2013**  
**Select SCG Inpatient Locations**

Data Source - ABX Usage download from Meditech Pharmacy Module including Patient Days

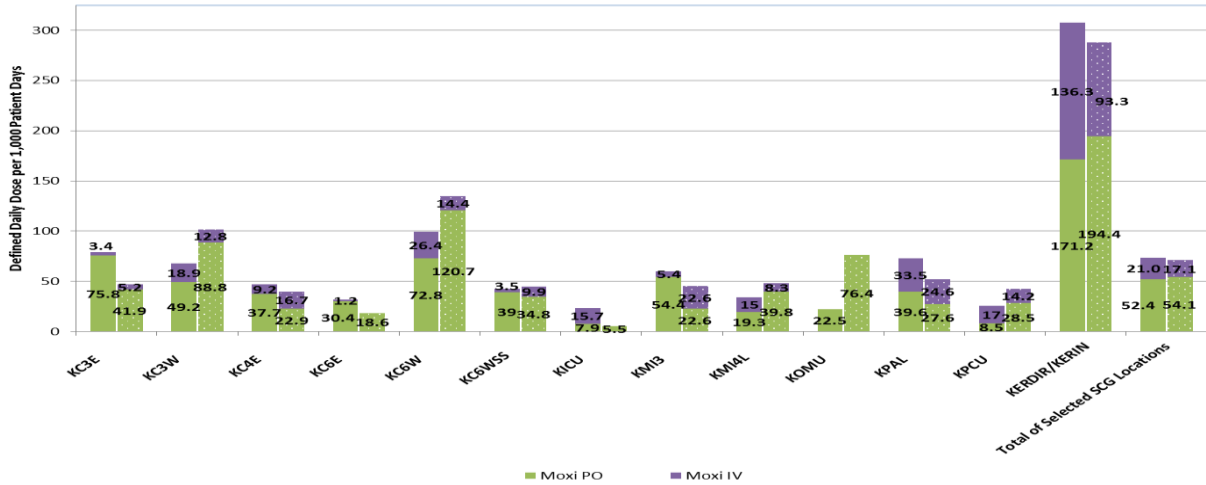

**Use of Ciprofloxacin, Percentage IV vs PO based on DDD/1,000 Patient Days**  
**Jan 7 - Feb 10, 2013 & Feb 11 - Mar 17, 2013**  
**Select SCG Inpatient Locations**

Data Source - ABX Usage download from Meditech Pharmacy Module including Patient Days

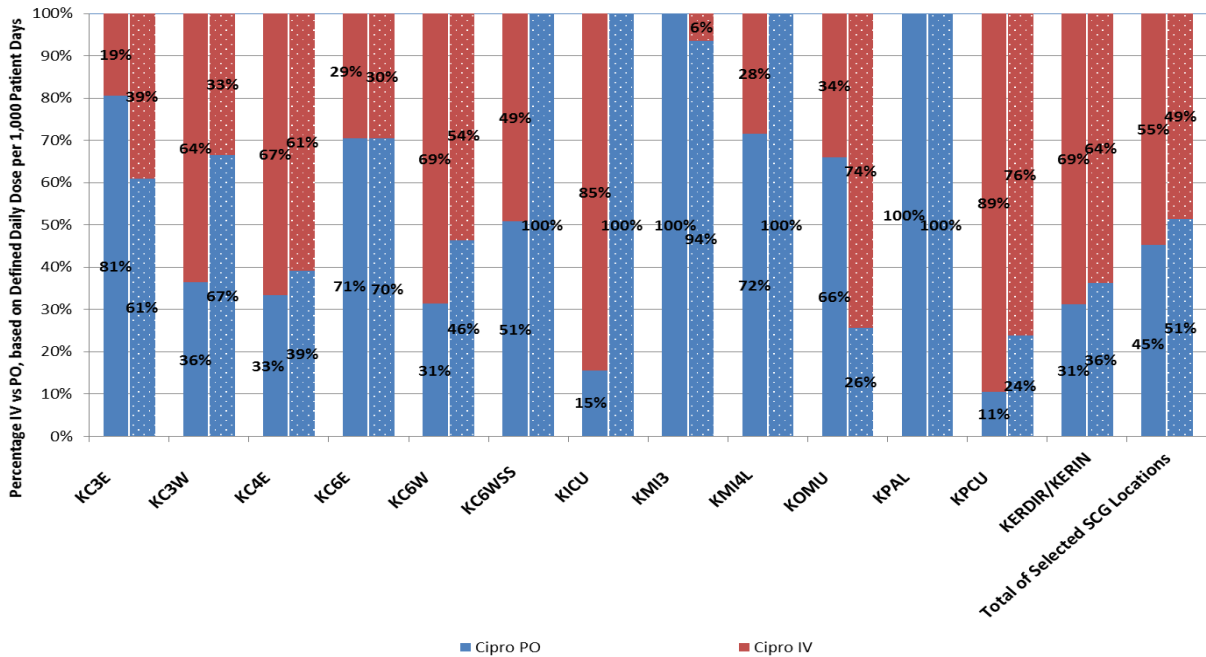

**Use of Levofloxacin, Percentage IV vs PO based on DDD/1,000 Patient Days  
Jan 7 - Feb 10, 2013 & Feb 11 - Mar 17, 2013**

**Select SCG Inpatient Locations**

Data Source - ABX Usage download from Meditech Pharmacy Module including Patient Days

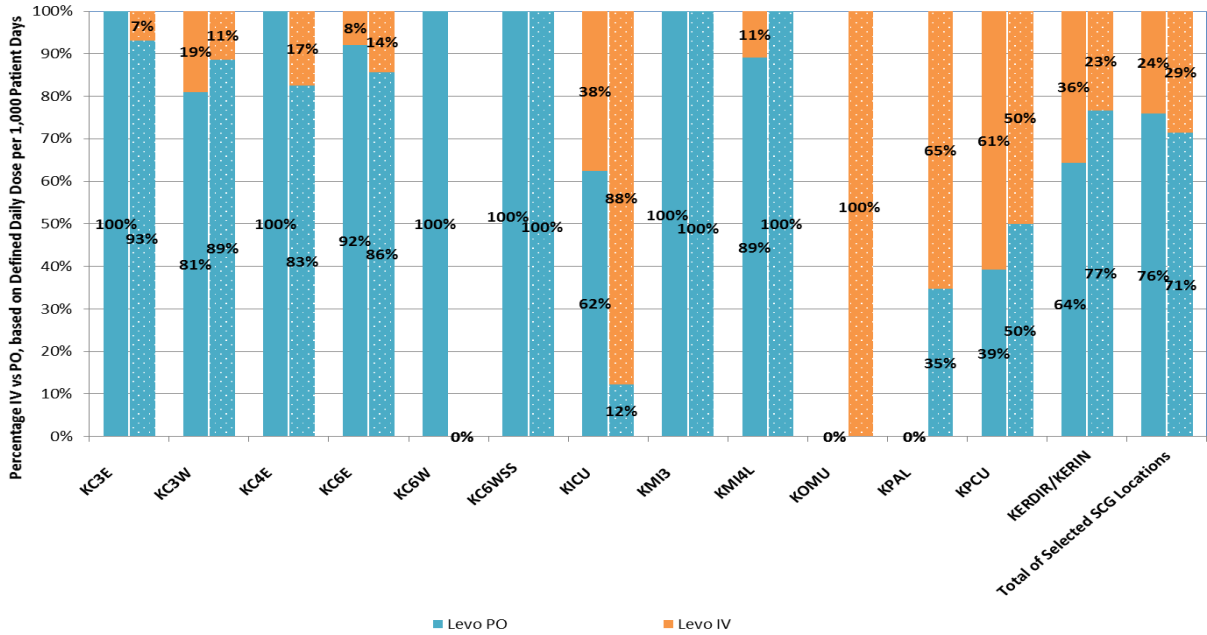

**Use of Moxifloxacin, Percentage IV vs PO based on DDD/1,000 Patient Days  
Jan 7 - Feb 10, 2013 & Feb 11 - Mar 17, 2013**

**Select SCG Inpatient Locations**

Data Source - ABX Usage download from Meditech Pharmacy Module including Patient Days

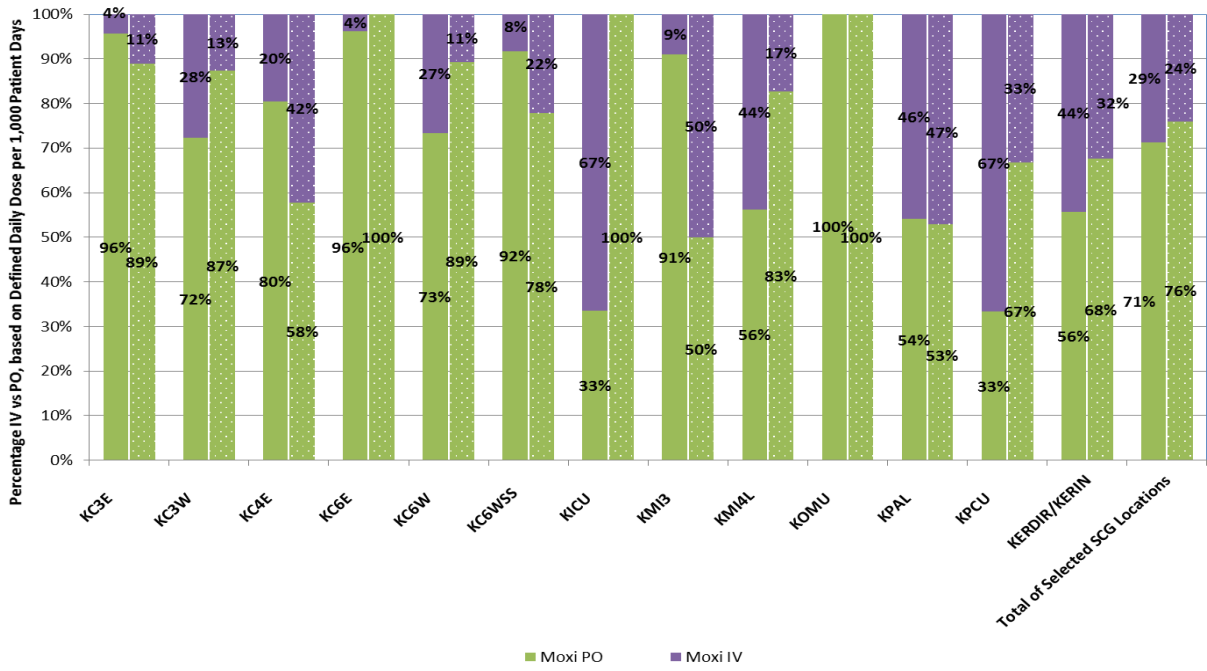

Supplement: bmjqir-4-u200786-w2247-s1.pdf [file bmjqir-4-u200786-w2247-s1.pdf]
