# Supplementary material for: The use of an IV to PO clinical intervention form to improve antibiotic administration in a community based hospital
Source: PubMed Central journal article supplement — BMJ Qual Improv Rep. 2015 Jan 28;4(1):u200786.w2247. doi: 10.1136/bmjquality.u200786.w2247 (PMC4645920; doi:10.1136/bmjquality.u200786.w2247), 2015-01-28
Supplement: bmjqir-4-u200786-w2247-s2.pdf [file bmjqir-4-u200786-w2247-s2.pdf]

## Appendix B: Intervention Results Tables & Figures

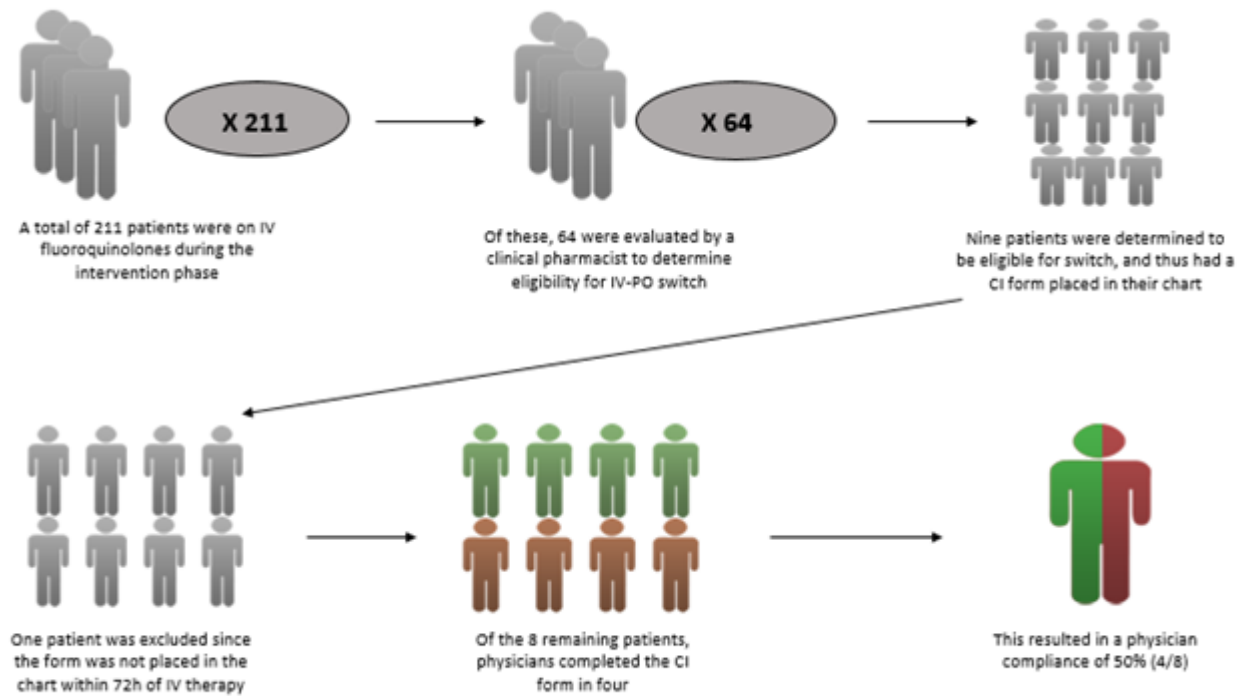

Figure 1. Outlining the intervention timeline for all patients on IV fluoroquinolones from February 11th - March 17th, 2013.

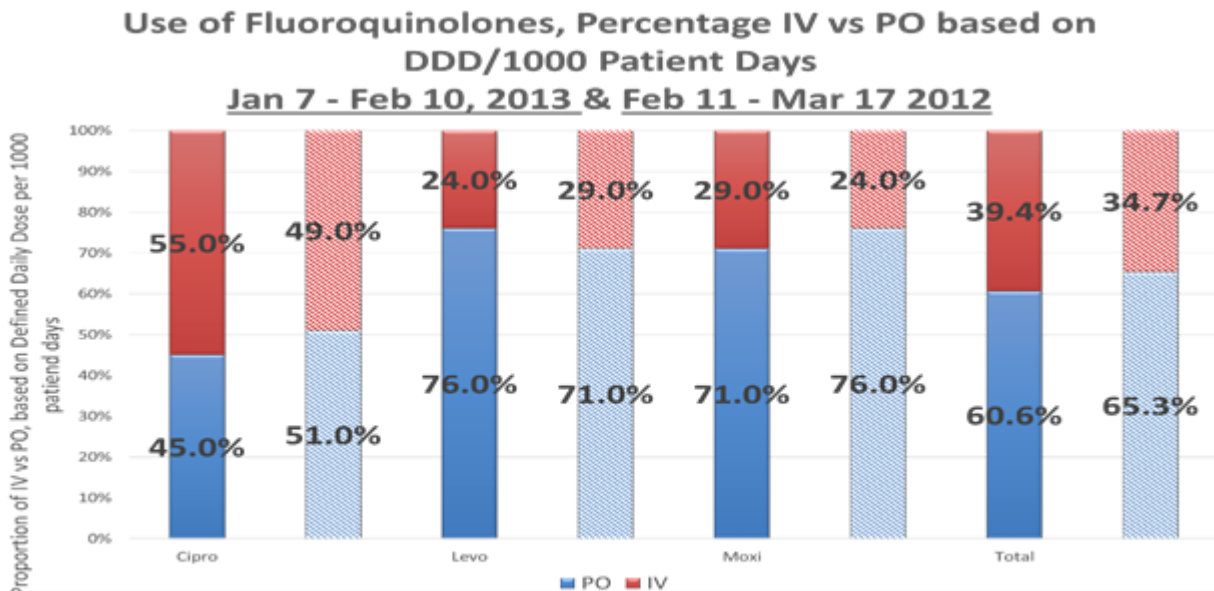

Figure 1. The hospital-wide ratio of IV:PO usage for each individual fluoroquinolone as well as the entire class. Shown as DDD/1000 patient days, as a ratio of total therapy. The bar on the left is the pre-intervention data while the bar on the right is the data from the intervention phase.

*Table 2. Comparison of patient outcome data between the individuals who had the attending physician complete the Clinical Intervention form to those who did not.*

|                          | <b>Physician Compliance</b> | <b>Non Physician Compliance</b> |
|--------------------------|-----------------------------|---------------------------------|
| <b>No. of patients</b>   | 4                           | 4                               |
| <b>Average days IV</b>   | 3                           | 4.25                            |
| <b>Average days PO</b>   | 3                           | 2.75                            |
| <b>Ratio IV:PO</b>       | 1:1                         | 1.55:1                          |
| <b>4+ days on IV abx</b> | 1                           | 3                               |
